# Supplementary material for: Effects of Vitamin D3 and Marine Omega-3 Fatty Acids Supplementation on Biomarkers of Systemic Inflammation: 4-Year Findings from the VITAL Randomized Trial
Source: MDPI journal article supplement (doi:10.3390/nu14245307), 2022-12-14
Supplement: s1 [file s1]

## Online Supporting Material

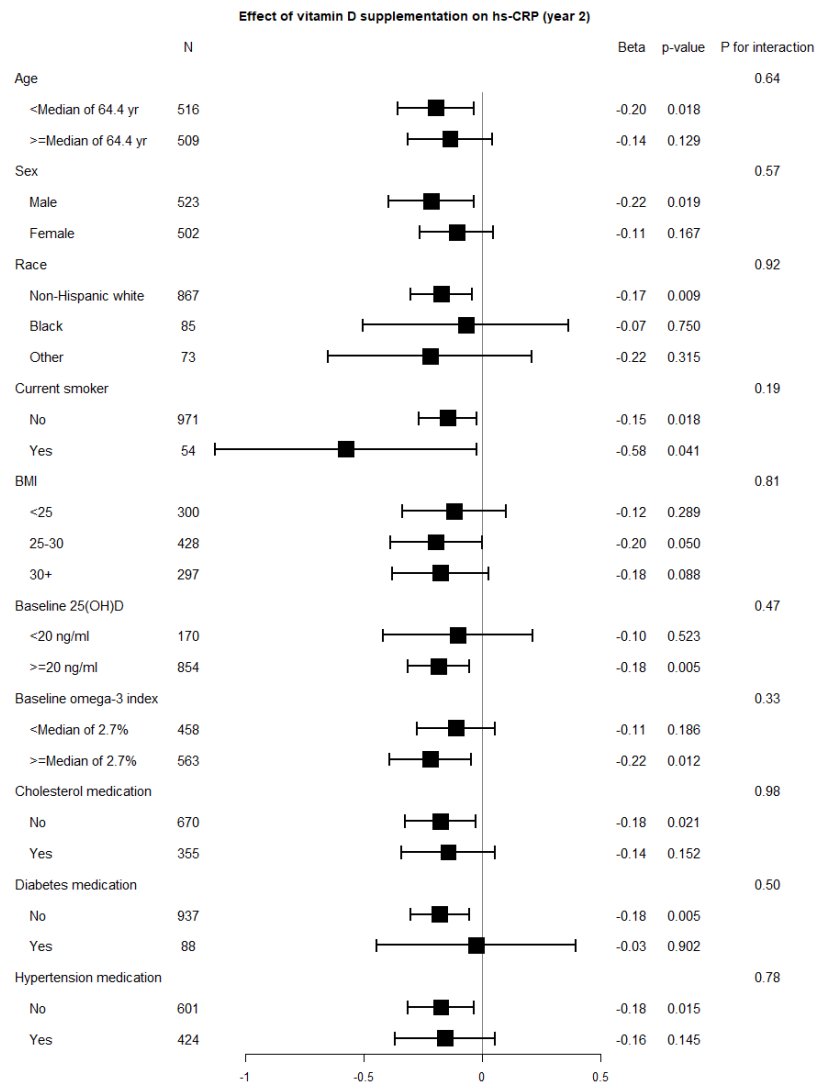

## Online Supporting Material

*Supplemental Figure S1. Subgroup analysis for the effects of vitamin D<sub>3</sub> supplementation on hs-CRP at year 2.* The effects of vitamin D<sub>3</sub> supplementation on hs-CRP were estimated by the interaction term of group assignment and measure time in two-level mixed-effects linear regression models. Autoregressive structure of order 1 of the within-group errors was assumed to account for successive observations with the groups. The hs-CRP was log-transformed. Models were adjusted for n-3 fatty acid randomization group (intention-to-treat analysis), age, sex, race, BMI, smoking, and taking medications for hypertension, diabetes, and lowering high cholesterol.
